# Supplementary material
Source: PubMed Central journal article supplement (PMC2438461)
Supplement: tpc.108.058859_1.pdf [file tpc.108.058859_1.pdf]

**Supplemental Figure 2.** Expression profiles of *SOM* during seed maturation.

(A) Averaged signal intensities of *SOM*, *ABI3*, and *PIL5* expressions were browsed from AtGenExpress database and visualized as heat maps using BAR Heat Mapper tools (<http://www.bar.utoronto.ca>) with *PP2A* as a control. (B) Averaged signal intensities of *SOM* expression in the wild type (*Ler*) and the *abi3* were browsed from the same database and visualized as heat maps. The index color map for the transcript levels was shown below. Abbreviation : RoL, rosette leaf ; CaL, cauline leaf ; SeL, senescing leaf ; cWL, continuous white light.

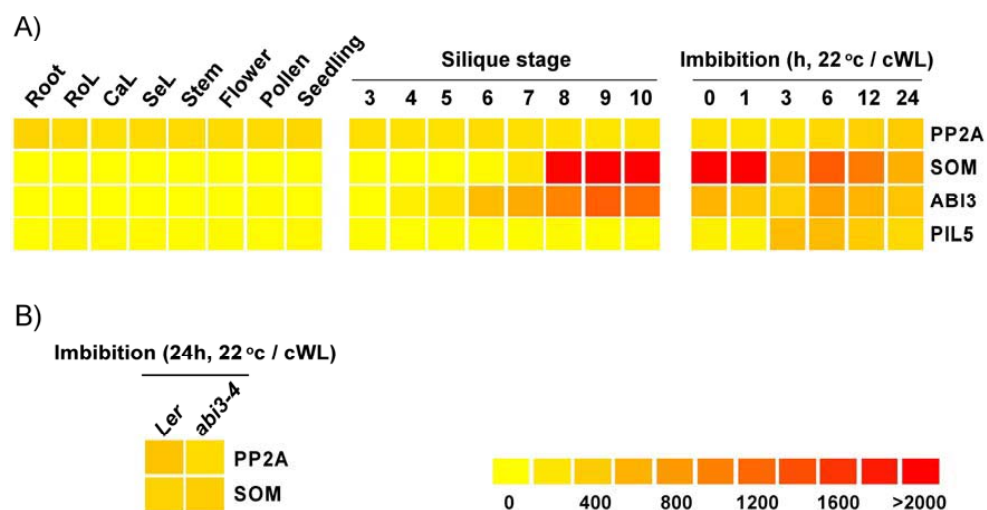

**Supplemental Figure 3.** Relative transcript levels of *SOM* in *Col-0*, *SOM-OX1*, *SOM-OX2*, and *SOM-OX3* seeds.

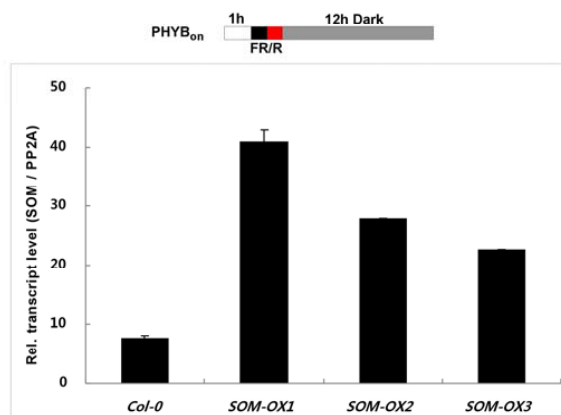

**Supplemental Table 1. Primer sequences used for real-time PCR**

**Primer sequences used for semi-quantitative RT-PCR**

|                         | <b>LP</b>                      | <b>RP</b>                        |
|-------------------------|--------------------------------|----------------------------------|
| <i>PP2A</i>             | TATCGGATGACGATTCTTCGTGCAG      | GCTTGGTCGACTATCGGAATGAGAG        |
| <i>GA3ox1</i>           | CCGAAGGTTTCACCATCACT           | CCCCAAAGGAATGCTACAGA             |
| <i>GA3ox2</i>           | TAGATCGCATCCCATCACA            | TGGATAACTGCTTGGGTTCC             |
| <i>GA2ox2</i>           | AATAACACGGCGGGTCTCAAATCT       | TCCTCGATCTCTTGTATCGGCTAA         |
| <i>RGA</i>              | CATTCCCGAAACGCGATTATCAG        | TCACCGTCGTTCTATGACTCCA           |
| <i>GAI</i>              | AGCGTCATGAAACGTTGAGTCAGTG      | TGCCAACCCAAACATGAGACAGC          |
| <i>RGL1</i>             | CAAGCTGGTGCTATGAGGAAAGTCG      | GCGCAAACCTTGAGATACGGACAAGA       |
| <i>RGL2</i>             | CCGACCCGAATCTGAAACCTTAGTG      | AAGCGCTTCGTTGAACCTATCGAG         |
| <i>RGL3</i>             | CAAACGAAACCTCTAATCGCTGCAT      | GGGCGAAATTGTCACAAAACGAAAC        |
| <i>ABAI</i>             | GATGCAGCCAAATATGGGTCAAGG       | GCCATTGCATGGATAATAGCGACTC        |
| <i>ABA2</i>             | AGAGGTGTTTGCATGATTCTGAGC       | TCCAGTGATCAATGCCACTTTACCC        |
| <i>AAO3</i>             | TCGATGTGCAGGTCAAAGAATTGC       | AACATCGGATGAACCTCGAAAAAGC        |
| <i>NCED6</i>            | ACCGGGTCGGATATAAATTGGGTTG      | CCCGGGTTGGTTCTCTGATTTC           |
| <i>NCED9</i>            | AACCGCCGCTATGGTTTTAGACG        | CCAGTCACCGGAAGGTTATGCAC          |
| <i>CYP707A2</i>         | ATGGGGTTGCCTTACATCGGAGA        | TGGCTTGACAAGTGAGCTTTGCT          |
| <i>SOM (full)</i>       | ATGGATGTCGTTTGTACGGAACATCAA    | TCAAGTCAAGAGATCATTGACCCATCC      |
| <i>SOM (truncated)</i>  | ATGGATGTCGTTTGTACGGAACATCAA    | CAAAAGAGTGCTCGTGGGAGAGCTG        |
| <i>SOM (expression)</i> | AGCAATCAGCGTCTCCATCTCCAG       | TCAAGTCAAGAGATCATTGACCCATCC      |
| <i>PIL5</i>             | TGAATCCCGTAGCGAGGAAACAA        | TTCCACATCCATTGACATCATCTG         |
| <i>UBQ10</i>            | GATCTTTGCCGAAAACAATTGGAGGATGGT | CGACTTGCATTAGAAAAGAAAGAGATAACAGG |

### Primer sequences used for ChIP PCR

|            | LP                                 | RP                                     |
|------------|------------------------------------|----------------------------------------|
| ChIP-SOM-A | AATCACAGAGAGACGCTGAGAGAGAGAAG      | GGCCGTTAAGAGTAAGTATGTGAAGAAGC          |
| ChIP-SOM-B | AATTAACGCTGTTGCTTGAAAGGAGG         | GTTTTCTTCTTCTCTCGATTCAGAAAGAG          |
| ChIP-SOM-C | GCTTTGGATTGTGTGGAACCATAATTTAAG     | AACAGATATACAGATGAAAGCGGTAATTTACATTT    |
| ChIP-SOM-D | GGTAGAAACAAAAATGTATTGCTTCCATC      | ACAACACAGAAAGGATATGCACGAGATTAAT        |
| ChIP-SOM-E | CTAGGTCTTTTATAAATAGGTTGTACGAGTTCTT | AAAGTTTATATGTAAGAAAAGACGTTCTTCAAACCTT  |
| ChIP-SOM-F | CGAGGGATGAACCAAATTTAATGTTTCTA      | CTTGATACGTAAGTCTATGTAATAAATACGT        |
| ChIP-SOM-G | TACTTCAAATGCTGATCGCTTTAACAAACAAG   | TCTCTTCTCTCTCCCTTATCAACATCC            |
| ChIP-SOM-H | CTTCTTTTGCATGAAACCTCTCTAAAACCTC    | GTAAGATGAAAGATGGGATATTGTGGTTTATATATATG |
| ChIP-SOM-I | GTAACATAACTGGAACAAAAGCAACAAG       | GCAAAAGGACAATCAGTCCAATCG               |
| ChIP-RGA-B | CAGACTCGGTCCTACCGTTTT              | CCGTCATTAACGGCCTCTTTCT                 |

**Supplemental Table 2.** Relative expression levels of various genes used for drawing graphs in the main text. The expression level of PP2A (At1g13320) was used as a control.

### Relative transcript level of *SOM* – corresponding to Figure 3D.

| Average value | PHYB <sub>off</sub> | PHYB <sub>on</sub> |
|---------------|---------------------|--------------------|
| <i>Col-0</i>  | 27.86 ± 0.00        | 8.4 ± 2.04         |
| <i>phyA</i>   | 28.13 ± 5.48        | 12.06 ± 4.06       |
| <i>phyB</i>   | 48.50 ± 0.00        | 43.74 ± 2.14       |

### Relative transcript level of *SOM* – corresponding to Figure 3E.

| Average value | PHYA <sub>off</sub> | PHYA <sub>on</sub> |
|---------------|---------------------|--------------------|
| <i>Col-0</i>  | 32.44 ± 3.65        | 8.35 ± 1.10        |
| <i>phyA</i>   | 47.88 ± 6.32        | 42.52 ± 7.05       |
| <i>phyB</i>   | 32.84 ± 8.13        | 12.78 ± 0.31       |

### Relative transcript levels of GA metabolic genes – corresponding to Figure 4A.

| Average value | <i>Col-0 FR</i> | <i>Col-0 R</i> | <i>som-1 FR</i> | <i>som-1 R</i> | <i>SOM-OXI FR</i> | <i>SOM-OXI R</i> |
|---------------|-----------------|----------------|-----------------|----------------|-------------------|------------------|
| <i>GA3ox1</i> | 0.04 ± 0.01     | 0.27 ± 0.02    | 0.11 ± 0.01     | 0.40 ± 0.01    | 0.01 ± 0.00       | 0.09 ± 0.03      |
| <i>GA3ox2</i> | 0.00 ± 0.00     | 0.05 ± 0.02    | 0.02 ± 0.00     | 0.11 ± 0.01    | 0.00 ± 0.00       | 0.02 ± 0.00      |
| <i>GA2ox2</i> | 0.16 ± 0.00     | 0.07 ± 0.01    | 0.07 ± 0.01     | 0.03 ± 0.01    | 0.27 ± 0.03       | 0.10 ± 0.02      |

**Relative transcript levels of ABA metabolic genes – corresponding to Figure 4C.**

| Average value     | <i>ABAI</i> (x0.1) | <i>ABA2</i> | <i>AAO3</i> | <i>NCED6</i> | <i>NCED9</i> | <i>CYP707A2</i> (x0.5) |
|-------------------|--------------------|-------------|-------------|--------------|--------------|------------------------|
| <i>Col-0 FR</i>   | 0.15 ± 0.00        | 0.05 ± 0.01 | 0.08 ± 0.00 | 0.14 ± 0.00  | 0.08 ± 0.03  | 0.11 ± 0.02            |
| <i>Col-0 R</i>    | 0.07 ± 0.00        | 0.05 ± 0.01 | 0.05 ± 0.01 | 0.04 ± 0.01  | 0.02 ± 0.01  | 0.17 ± 0.01            |
| <i>som-1 FR</i>   | 0.10 ± 0.01        | 0.07 ± 0.00 | 0.07 ± 0.01 | 0.07 ± 0.02  | 0.04 ± 0.01  | 0.21 ± 0.01            |
| <i>som-1 R</i>    | 0.05 ± 0.01        | 0.08 ± 0.03 | 0.05 ± 0.02 | 0.01 ± 0.00  | 0.02 ± 0.01  | 0.25 ± 0.01            |
| <i>SOM-OXI FR</i> | 0.25 ± 0.02        | 0.06 ± 0.01 | 0.11 ± 0.01 | 0.18 ± 0.03  | 0.10 ± 0.01  | 0.05 ± 0.00            |
| <i>SOM-OXI R</i>  | 0.14 ± 0.02        | 0.07 ± 0.01 | 0.08 ± 0.01 | 0.05 ± 0.02  | 0.07 ± 0.00  | 0.13 ± 0.03            |

**Relative transcript levels of GA signaling genes – corresponding to Figure 5A.**

| Average value | <i>Col-0 FR</i> | <i>Col-0 R</i> | <i>som-1 FR</i> | <i>som-1 R</i> | <i>SOM-OXI FR</i> | <i>SOM-OXI R</i> |
|---------------|-----------------|----------------|-----------------|----------------|-------------------|------------------|
| <i>RGA</i>    | 3.88 ± 0.57     | 1.57 ± 0.08    | 3.77 ± 0.73     | 2.15 ± 0.21    | 3.19 ± 0.08       | 1.42 ± 0.14      |
| <i>GAI</i>    | 5.86 ± 0.29     | 2.65 ± 0.26    | 5.49 ± 0.81     | 3.11 ± 0.23    | 5.85 ± 0.49       | 3.19 ± 0.77      |
| <i>RGL1</i>   | 0.01 ± 0.00     | 0.07 ± 0.03    | 0.08 ± 0.02     | 0.05 ± 0.01    | 0.01 ± 0.00       | 0.02 ± 0.01      |
| <i>RGL2</i>   | 3.81 ± 0.63     | 4.78 ± 0.70    | 5.10 ± 0.25     | 4.89 ± 0.24    | 3.95 ± 0.23       | 4.97 ± 0.97      |
| <i>RGL3</i>   | 0.54 ± 0.00     | 0.83 ± 0.56    | 0.81 ± 0.08     | 1.10 ± 0.32    | 0.60 ± 0.09       | 0.66 ± 0.22      |

**Relative transcript level of *SOM* – corresponding to Figure 6A.**

| Average value    | PHYB <sub>off</sub> | PHYB <sub>on</sub> |
|------------------|---------------------|--------------------|
| <i>Col-0</i>     | 27.05 ± 3.96        | 8.29 ± 0.41        |
| <i>pil5</i>      | 2.32 ± 0.45         | 3.10 ± 0.90        |
| <i>phyB</i>      | 42.33 ± 4.14        | 40.81 ± 2.00       |
| <i>phyB/pil5</i> | 5.13 ± 0.75         | 2.32 ± 0.45        |

**Relative transcript level of *SOM* – corresponding to Figure 6B.**

| Average value    | PHYA <sub>off</sub> | PHYA <sub>on</sub> |
|------------------|---------------------|--------------------|
| <i>Col-0</i>     | 28.13 ± 5.48        | 8.08 ± 1.57        |
| <i>pil5</i>      | 1.08 ± 0.10         | 0.70 ± 0.06        |
| <i>phyA</i>      | 48.50 ± 0.00        | 37.11 ± 7.23       |
| <i>phyA/pil5</i> | 0.59 ± 0.04         | 0.47 ± 0.07        |

**Relative transcript levels of GA metabolic genes – corresponding to Figure 7D.**

| Average value      | GA3ox1      | GA3ox2      | GA2ox2      |
|--------------------|-------------|-------------|-------------|
| <i>Col-0</i>       | 0.21 ± 0.03 | 0.12 ± 0.02 | 0.12 ± 0.02 |
| <i>PIL5-OX</i>     | 0.02 ± 0.08 | 0.00 ± 0.00 | 0.35 ± 0.01 |
| <i>PIL5-OX som</i> | 0.12 ± 0.01 | 0.08 ± 0.01 | 0.17 ± 0.03 |
| <i>som</i>         | 0.41 ± 0.00 | 0.21 ± 0.03 | 0.08 ± 0.03 |

**Relative transcript levels of ABA metabolic genes – corresponding to Figure 7E.**

| Average value      | ABA1 (x0.1) | ABA2        | AAO3        | NCED6       | NCED9       | CYP707A2 (x0.5) |
|--------------------|-------------|-------------|-------------|-------------|-------------|-----------------|
| <i>Col-0</i>       | 0.13 ± 0.01 | 0.09 ± 0.00 | 0.07 ± 0.01 | 0.10 ± 0.00 | 0.08 ± 0.00 | 0.16 ± 0.02     |
| <i>PIL5-OX</i>     | 0.34 ± 0.03 | 0.10 ± 0.01 | 0.14 ± 0.02 | 0.16 ± 0.03 | 0.15 ± 0.02 | 0.04 ± 0.00     |
| <i>PIL5-OX som</i> | 0.22 ± 0.01 | 0.08 ± 0.02 | 0.12 ± 0.02 | 0.12 ± 0.01 | 0.10 ± 0.01 | 0.12 ± 0.01     |
| <i>som</i>         | 0.07 ± 0.03 | 0.05 ± 0.02 | 0.08 ± 0.02 | 0.05 ± 0.01 | 0.06 ± 0.01 | 0.29 ± 0.07     |

**Relative transcript levels of GA signaling genes – corresponding to Figure 7F.**

| Average value      | RGA         | GAI         | RGL1        | RGL2        | RGL3        |
|--------------------|-------------|-------------|-------------|-------------|-------------|
| <i>Col-0</i>       | 1.69 ± 0.25 | 3.06 ± 0.60 | 0.09 ± 0.03 | 4.76 ± 0.23 | 1.11 ± 0.43 |
| <i>PIL5-OX</i>     | 3.87 ± 0.19 | 6.51 ± 0.64 | 0.01 ± 0.00 | 6.51 ± 0.64 | 0.58 ± 0.06 |
| <i>PIL5-OX som</i> | 3.16 ± 0.46 | 5.17 ± 0.81 | 0.17 ± 0.09 | 5.89 ± 0.86 | 1.11 ± 0.43 |
| <i>som</i>         | 1.81 ± 0.27 | 2.59 ± 0.68 | 0.14 ± 0.06 | 4.16 ± 0.10 | 1.33 ± 0.39 |

**Relative transcript level of *SOM* – corresponding to Supplemental Figure 3.**

|                | Average value |
|----------------|---------------|
| <i>Col-0</i>   | 7.73 ± 0.38   |
| <i>SOM-OX1</i> | 40.81 ± 2.00  |
| <i>SOM-OX2</i> | 27.86 ± 0.00  |
| <i>SOM-OX3</i> | 22.63 ± 0.00  |
